# Supplementary material
Source: PubMed Central journal article supplement (PMC5621917)

## Adrenergic mediated increases in *INHBA* drive CAF phenotype and collagens

Archana S. Nagaraja<sup>1</sup>, Robert L. Dood<sup>1</sup>, Guillermo Armaiz-Pena<sup>1,&</sup>, Yu Kang<sup>1,#</sup>, Sherry Y. Wu<sup>1</sup>, Julie K. Allen<sup>1</sup>, Nicholas B. Jennings<sup>1</sup>, Lingegowda S. Mangala<sup>1</sup>, Sunila Pradeep<sup>1</sup>, Yasmin Lyons<sup>1</sup>, Monika Haemmerle<sup>1</sup>, Kshipra M. Gharpure<sup>1</sup>, Nouara C. Sadaoui<sup>1</sup>, Cristian Rodriguez-Aguayo<sup>2,3</sup>, Cristina Ivan<sup>2</sup>, Ying Wang<sup>4</sup>, Keith Baggerly<sup>4</sup>, Prahlad Ram<sup>5</sup>, Gabriel Lopez-Berestein<sup>2,3</sup>, Jinsong Liu<sup>1</sup>, Samuel C. Mok<sup>1</sup>, Lorenzo Cohen<sup>7</sup>, Susan K. Lutgendorf<sup>7</sup>, Steve W. Cole<sup>8</sup>, Anil K. Sood<sup>1,2,9\*</sup>

### Supplementary Figures and Tables

#### Supplementary Figures

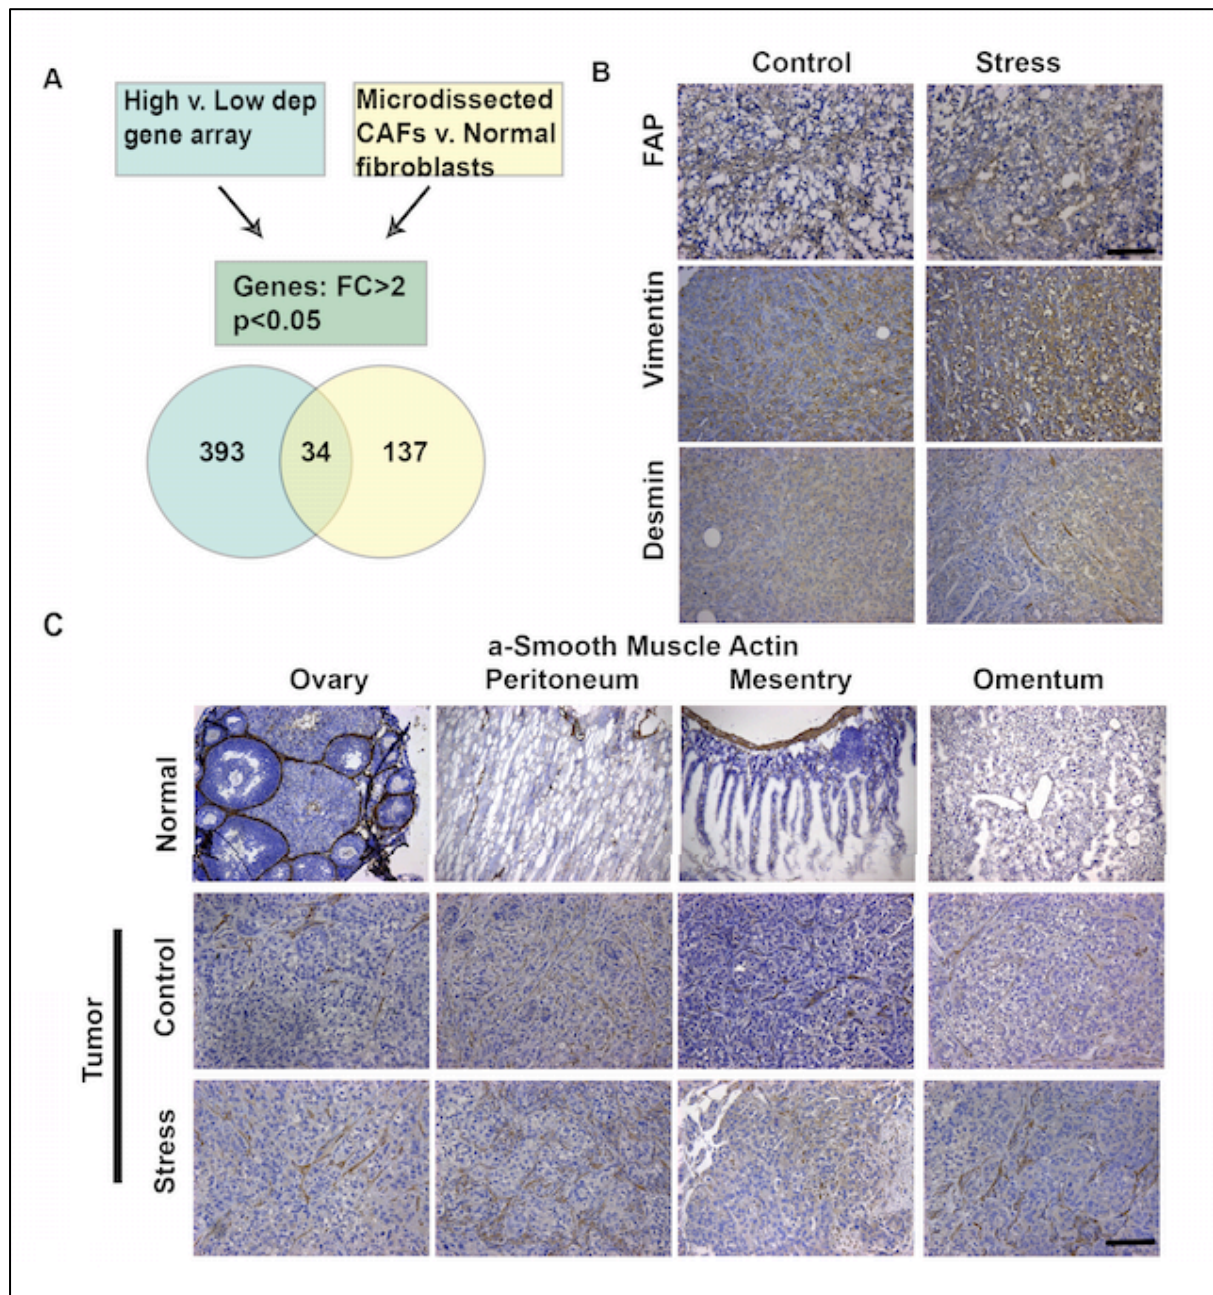

Supplementary Figure 1: Restraint stress increases CAF content in primary as well as metastatic sites.

(a) Venn diagram showing comparison of genes that are upregulated 2-fold in tumor samples from ovarian cancer patients with a high depression (dep) score compared to those with a low depression score and in microdissected cancer-associated fibroblasts (CAFs) compared to normal fibroblasts in primary ovarian cancer. FC, fold-change. (b) Expression of CAF marker fibroblast activated protein (FAP), desmin and vimentin in micrographs of representative tumors from control and restraint-stressed mice in the adrenergic-receptor positive Skov3-ip1 model. (c) Expression of CAF marker alpha-smooth muscle actin ( $\alpha$ -SMA) in micrographs of representative normal tissues and matched metastatic tumors from the Skov3-ip1 mouse model. Scale bars, 100 $\mu$ M, n=5/group for FAP, Desmin, Vimentin data; n=3/group for metastatic data.

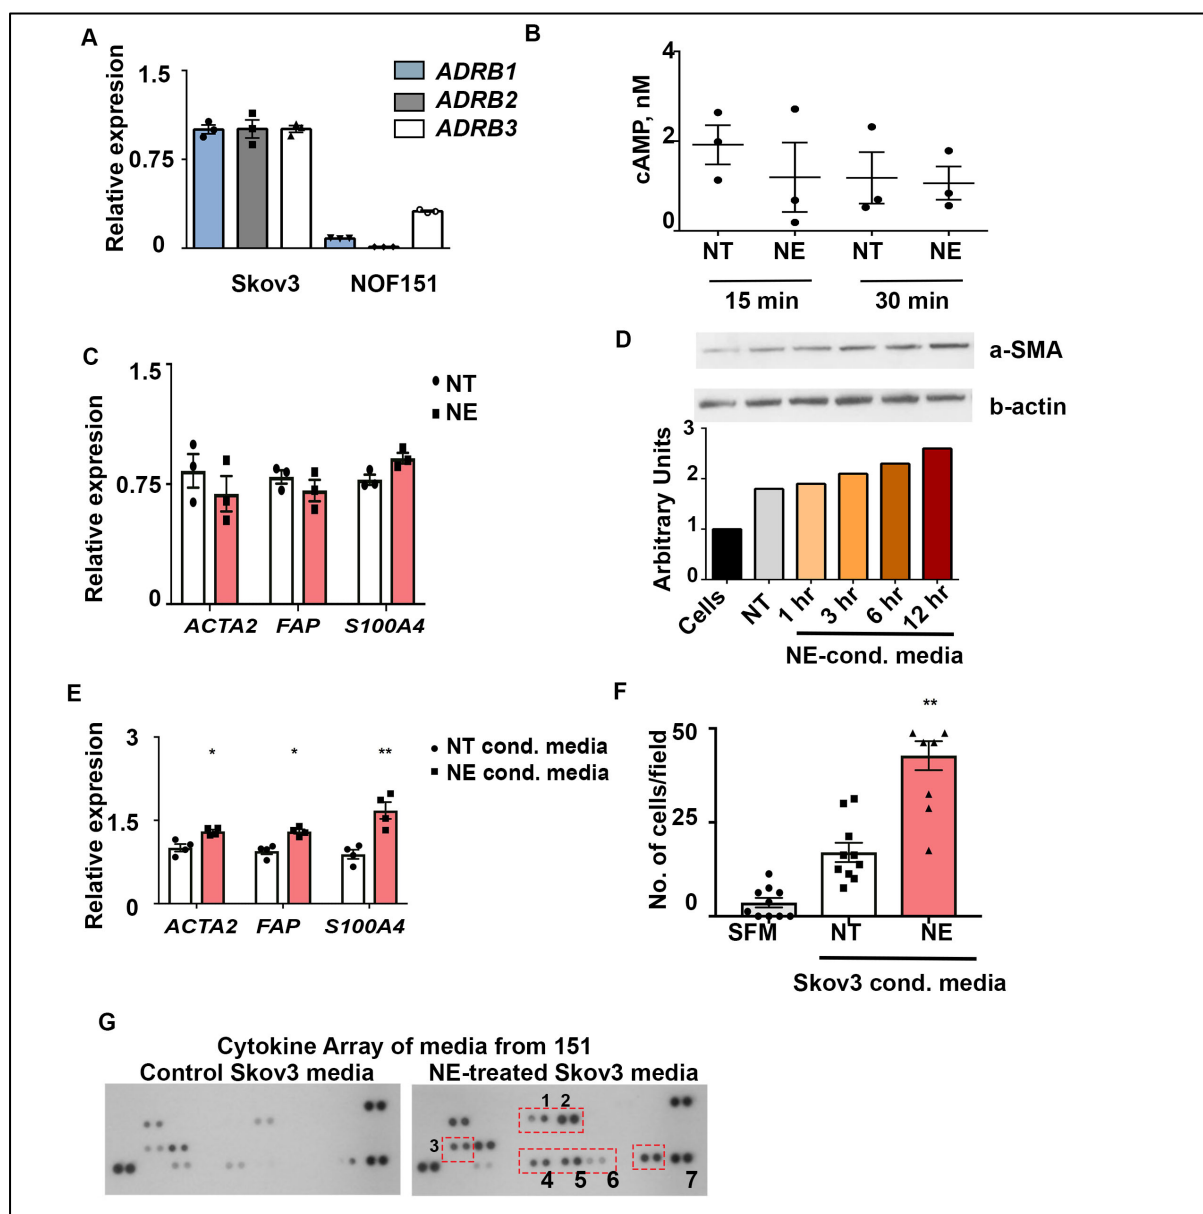

**Supplementary Figure 2: Conditioned media from NE-treated cancer cells accelerate transformation of normal ovarian fibroblasts**

(a) Expression of beta-adrenergic receptors (ADRB) in NOF151 normal fibroblasts relative to ADRB-positive Skov3-ip1 cells. (b) ELISA for cAMP in NOF151 treated with norepinephrine (NE) for 15 or 30 min or not treated (NT). (c) Expression of CAF markers *ACTA2*, *S100A4*, and *FAP* in NOF151 cells after treatment with NE (NT: non-treated controls). (d) Expression of CAF markers *ACTA2*, *S100A4*, and *FAP* in NOF151 cells after exposure to medium conditioned by Skov3-ip1 cells treated with NE or control (NT). (e) Expression of CAF marker alpha-smooth muscle actin ( $\alpha$ -SMA) in NOF151 cells after exposure to medium conditioned by NE-treated Skov3-ip1 cells. (f) *In vitro* migratory potential of NOF151 cells toward serum-free medium (SFM), medium conditioned by untreated Skov3-ip1 cells, or medium conditioned by NE-treated SKov3-ip1 cells through 0.1% gelatin over 6 h was assessed by fixing and counting the number of cells migrated per high-power field (10 fields/group). (g) Immunoblot multiplex assay for pro-inflammatory cytokines in NOF151 cells exposed to medium conditioned by NE-treated or NT Skov3-ip1 cells. (1: GCSF, 2: GM-CSF, 3: IL1a, 4: CCL2, 5: MIF, 6: CCL3, 7: PAI1). Data are presented as mean  $\pm$  s.e.m. of n=3 for

all experimental groups. Statistical significance was obtained using the 1-way ANOVA: \* $p < 0.05$ , \*\* $p < 0.01$ .

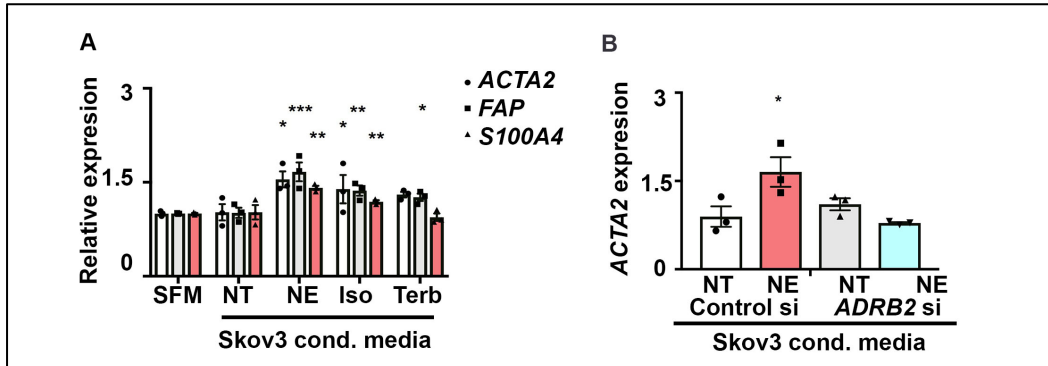

**Supplementary Figure 3: Restraint stress increases  $\alpha$ SMA in an ADRB2-dependent manner**

(a) Expression of CAF markers *ACTA2*, *S100A4*, and *FAP* in NOF151 cells exposed to serum-free medium (SFM) or to medium conditioned by Skov3-ip1 cells that were untreated (NT) or treated with norepinephrine (NE), nonspecific beta-agonist isoproterenol (Iso), or ADRB2-specific agonist terbutaline (Terb). (b) *ACTA2* expression in NOF151 treated with ADRB2 or control siRNA and conditioned with NT or NE-treated Skov3-ip1 cells. Data are presented as mean  $\pm$  s.e.m. of  $n=3$  for all experimental groups. Statistical significance was obtained using the 1-way ANOVA: \* $p < 0.05$ , \*\* $p < 0.01$ , \*\*\* $p < 0.001$ .

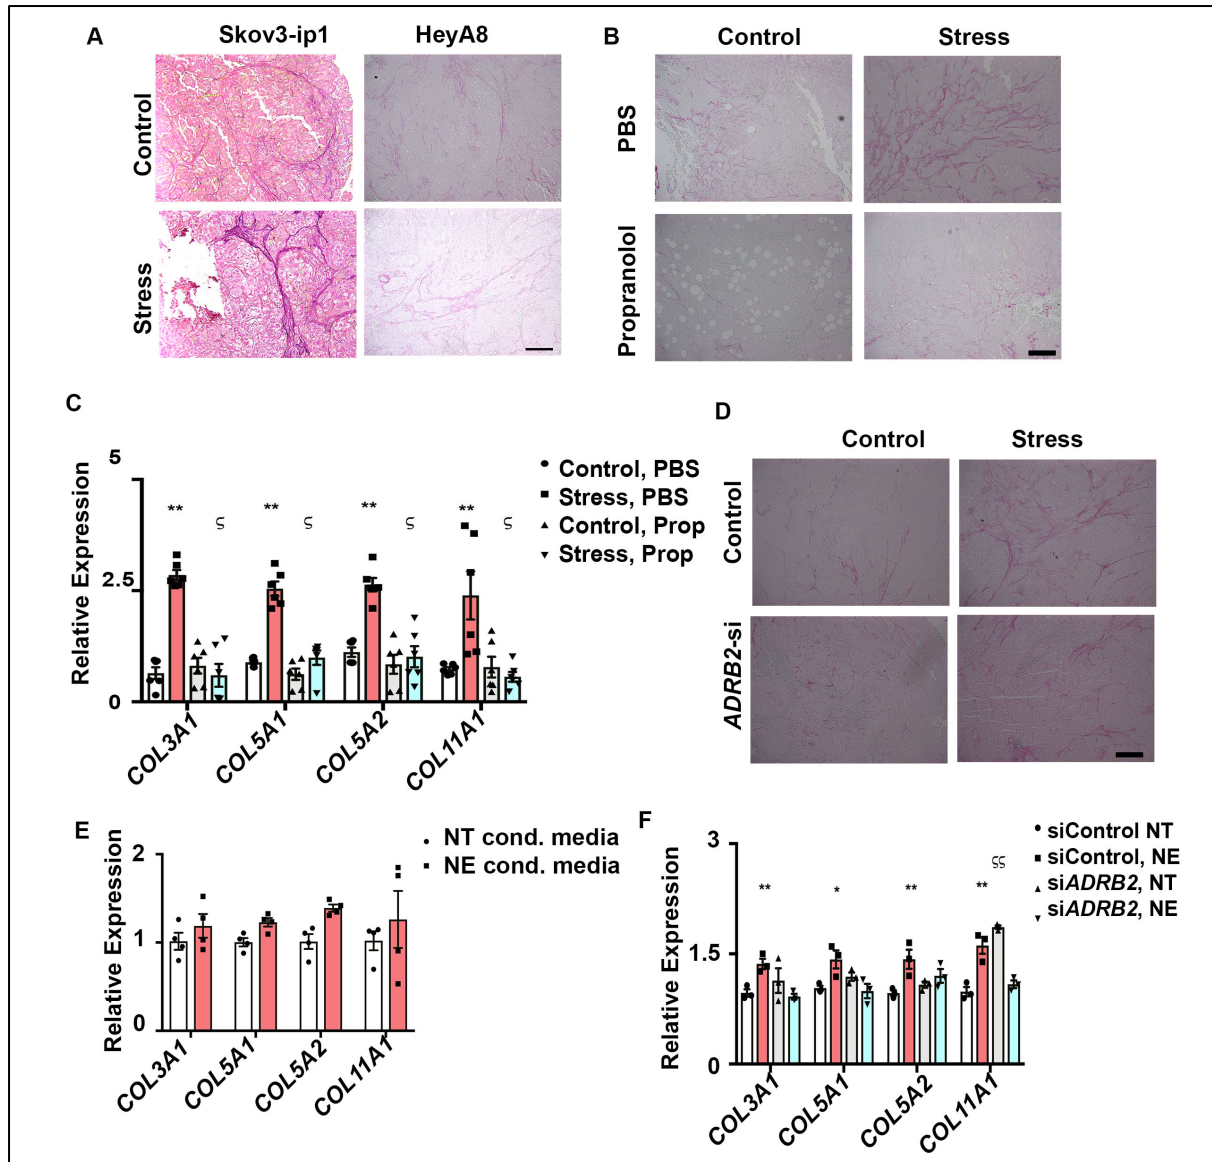

**Supplementary Figure 4: Restraint stress increases collagen levels in tumors in an ADRB2 dependent manner**

(a) Expression of collagen detected by Sirius staining in micrographs of representative Skov3-ip1 and HeyA8 tumors from control and restraint-stressed mice. (b) Expression of collagen detected by Sirius staining on micrographs of representative HeyA8 tumors from control and stressed mice treated with nonspecific beta-blocker propranolol or PBS. (c) Expression of collagen genes in Skov3-ip1 tumors from control and stressed mice treated with nonspecific beta-blocker propranolol (Prop) or Saline. (d) Expression of collagen detected by Sirius staining in micrographs of representative HeyA8 tumors from control and stressed mice treated with control or ADRB2 siRNA. (e) Expression of collagen genes in NOF151 cells exposed to medium conditioned by untreated (NT) or norepinephrine (NE)-treated Skov3-ip1 cells. (f) Expression of collagen genes in NOF151 cells exposed to medium conditioned by untreated (NT) or norepinephrine (NE) and ADRB2 silenced Skov3 cells. Scale bars, 100 $\mu$ M. Data are presented as mean $\pm$ s.e.m. of n=3 for all experimental groups. Statistical significance was obtained using the 1-way ANOVA: \* $p < 0.05$ , \*\* $p < 0.01$  compared to controls,  $\zeta p < 0.05$  compared to stress or NE-treated cells.



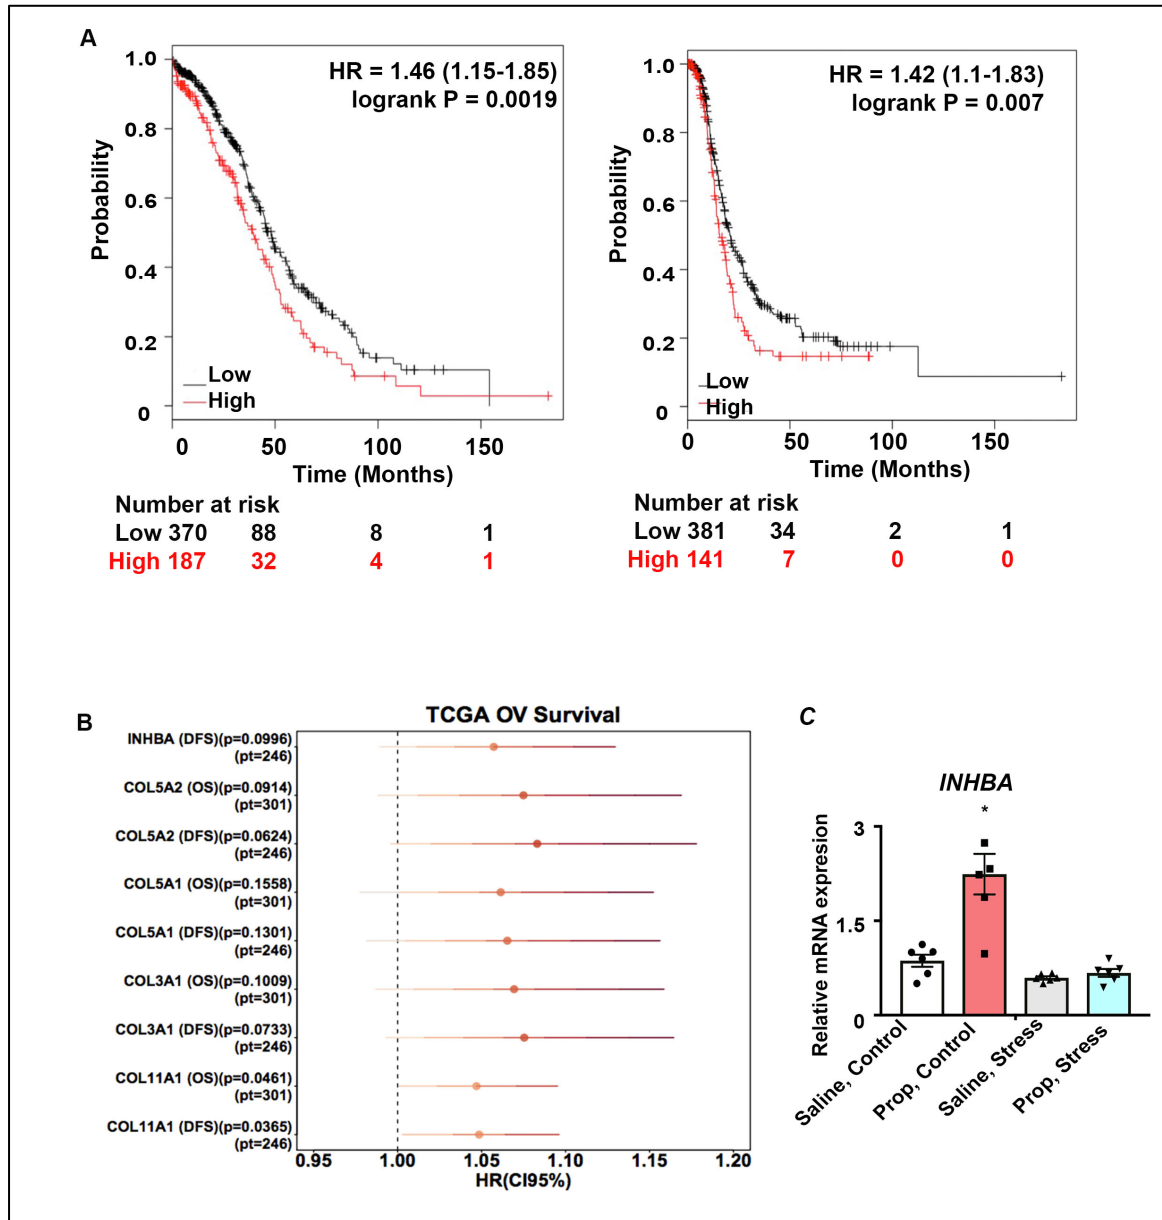

**Supplementary Figure 5: INHBA in ovarian cancer is associated with worse PFS and OS.**

(a) Kaplan-Meier plots for overall survival (left) and progression-free survival (right) in patients with ovarian cancer, based on expression level of *INHBA*. Data were extracted from The Cancer Genome Atlas database. (b) General plots showing the hazard ratio, confidence interval and p-value for ovarian cancer using TCGA data. (c) Expression of *INHBA* in HeyA8 tumors from control and restraint-stressed mice treated with nonspecific beta-blocker propranolol (Prop) or PBS. Data are presented as mean  $\pm$  s.e.m. of n=5 for all experimental groups. \* $p < 0.05$ , compared to controls.

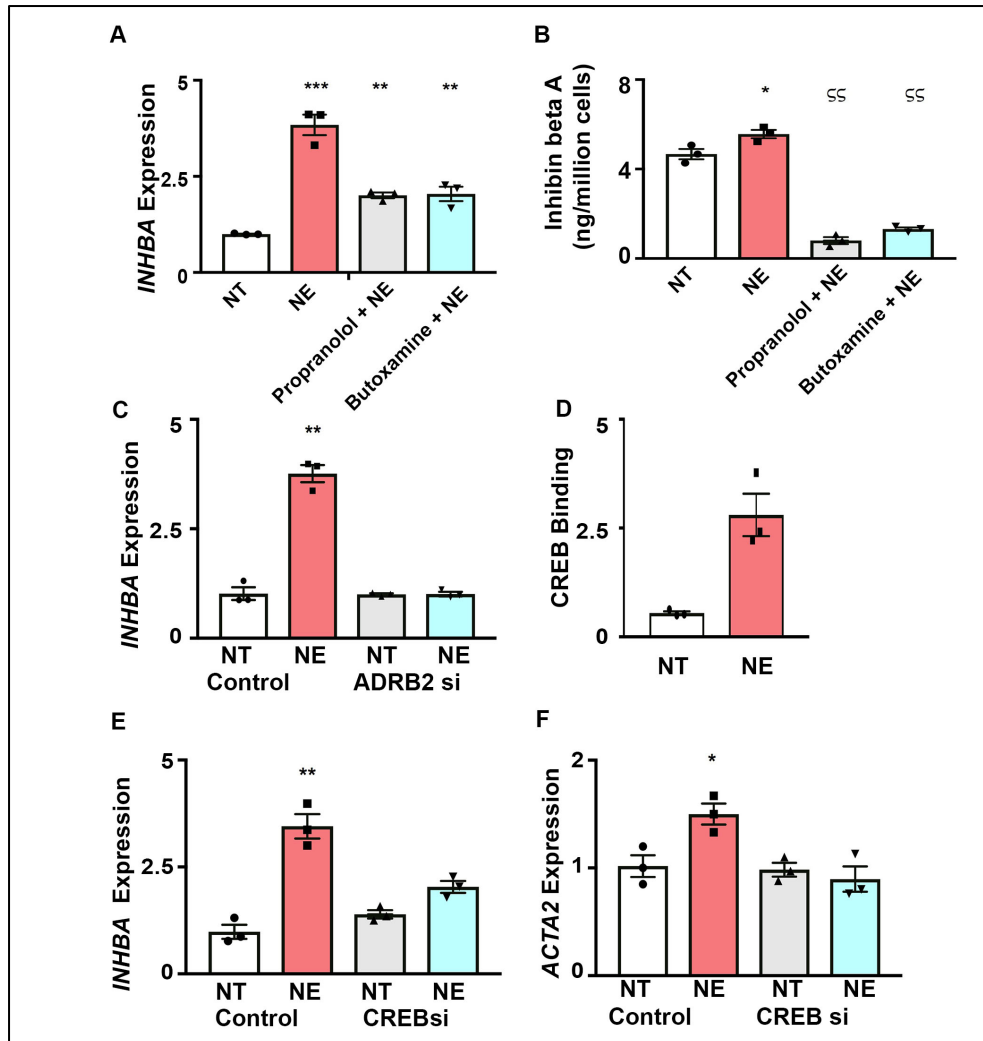

### Supplemental Figure 6: INHBA expression in tumor cells is mediated by ADRB2 and CREB

(a) Expression of *INHBA* in Skov3-ip1 cells after no treatment (NT) or treatment with norepinephrine (NE) with or without propranolol or ADRB2-specific blocker butoxamine. (b) Concentration of Inhibin Beta A in HeyA8 cells after no treatment or treatment with NE with or without propranolol, or butoxamine. (c) Effect of silencing ADRB2 on *INHBA* expression in Skov3 cells not treated or treated with NE. (d) Chromatin immunoprecipitation analysis for CREB binding to the *INHBA* promoter in Skov3-ip1 cells not treated or treated with NE. (e) Effect of silencing CREB on *INHBA* expression in Skov3 cells not treated or treated with NE. (f) Effect of medium conditioned by CREB1 siRNA- or control siRNA- treated cells not treated or treated with NE on CAF marker ACTA2 expression in NOF151 cells. Data are presented as mean  $\pm$  s.e.m. of  $n=3$  for all experimental groups. Statistical significance was obtained using the 1-way ANOVA: \* $p < 0.05$ , \*\* $p < 0.01$ , \*\*\* $p < 0.001$ .  $^{SS}p < 0.01$  compared to stress or NE-treated cells.

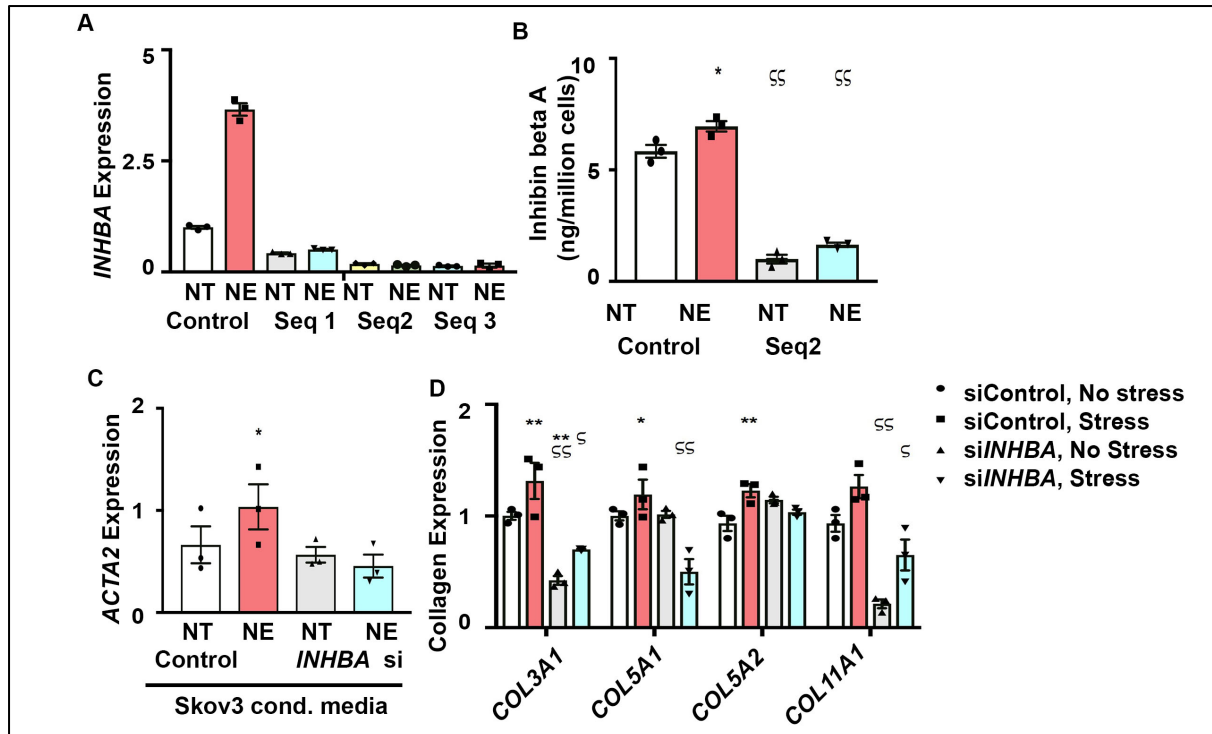

**Supplementary Figure 7: Conditioned media from INHBA-silenced tumor cells decrease CAF-phenotype and collagens in NOF151**

(a) Validation of multiple sequences of *INHBA* siRNA in HeyA8 cells not treated (NT) or treated with norepinephrine (NE). (b) Concentration of Inhibin Beta A in HeyA8 cells after *INHBA* was silenced via siRNA sequence 2 and no treatment or treatment with NE. (c) Effect of conditioned medium from *INHBA* siRNA- or control siRNA-treated Skov3 cells on expression of CAF marker ACTA2 in untreated or NE-treated NOF151 cells. (d) Effect of conditioned medium from *ADRB2* siRNA- or *INHBA* siRNA- NE-treated Skov3 cells on collagen expression in NOF151 cells. Data are presented as mean±s.e.m. of n=3 for all experimental groups. Statistical significance was obtained using the 1-way ANOVA: \*p < 0.05, \*\*p < 0.01 compared to control, <sup>†</sup>p<0.05, <sup>ss</sup>p<0.01 compared to NE-treated cells.



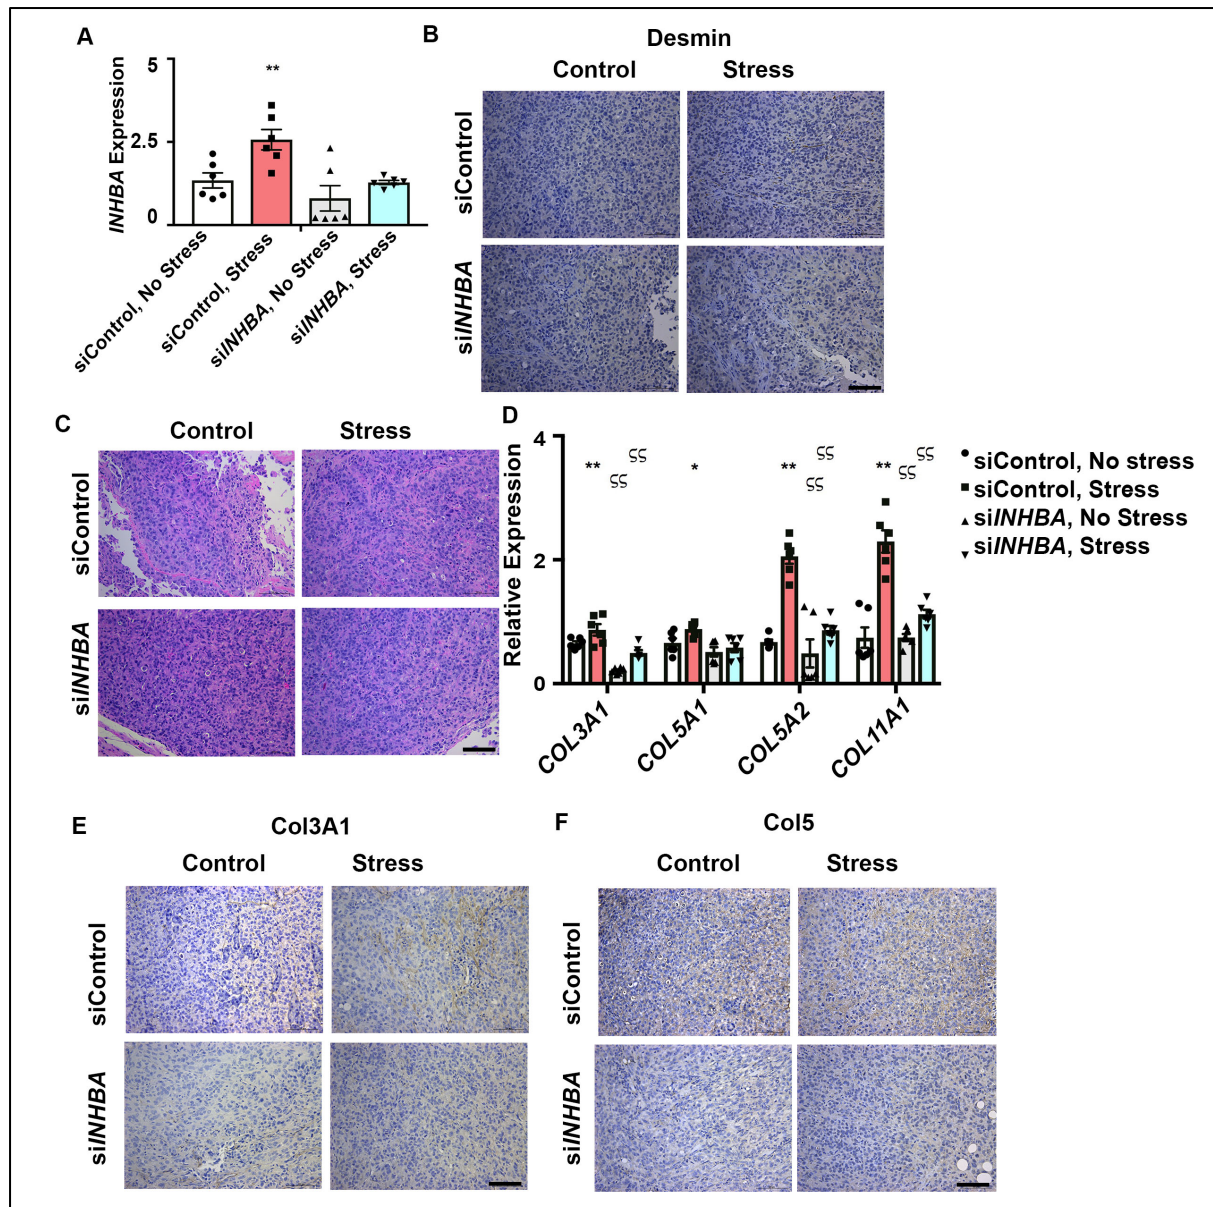

### Supplementary Figure 8: Silencing *INHBA* in tumor cells during restraint stress decreases CAFs and collagen content

Effects of silencing *INHBA* *in vivo* in orthotopic HeyA8 tumor-bearing mice subjected or not subjected (control) to daily restraint stress and treated twice per week with either control siRNA or *INHBA* siRNA. (a) Validation of knockdown of *INHBA* by qRT-PCR. (b) Expression of desmin in micrographs of representative tumors from control and restraint stressed mice treated with control or *INHBA* siRNA. (c) H&E micrographs of representative tumors from control and restraint stressed mice treated with control or *INHBA* siRNA. (d) Expression of ACTA2 and collagens after *INHBA* silencing. (e-f) Expression of specific collagens in micrographs of representative tumors from control and restraint stressed mice treated with control or *INHBA* siRNA. Scale bars, 100 $\mu$ m. Data are presented as mean $\pm$ s.e.m. of n=3 for all experimental groups. Statistical significance was obtained using the 1-way ANOVA: \*p < 0.05, \*\*p < 0.01 compared to siControl-no stress, <sup>SS</sup>p<0.01 compared to siControl-Stress.

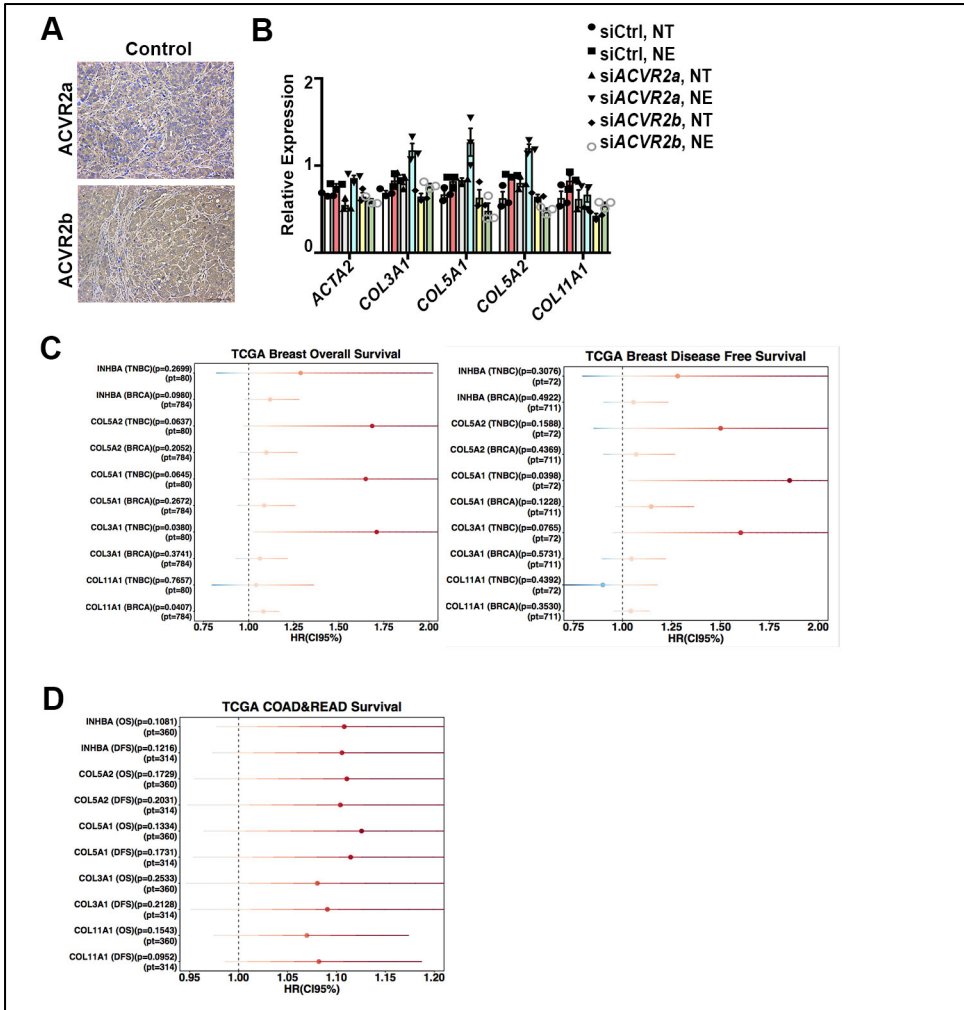

**Supplementary Figure 9: Role of ACVR receptor and Survival data for breast and colon cancers.**

(a) Expression of ACVR2a and ACVR2b in ovarian tumor stroma. (b) Effect of NE-conditioned media after silencing ACVR2a and ACVR2b in NOF151 cells on ACTA2 and collagen expression. (c-d) General plots showing the hazard ratio, confidence interval and p-value for breast and colon cancers using TCGA data. Data are presented as mean±s.e.m. of n=3 for all experimental groups. Scale bars, 100µM.

## Supplementary Tables

**Supplementary Table 1: Gene co-expression with *INHBA* in TCGA ovarian cancer samples (highlighted probes common with Table S1)**

| Gene Symbol    | Reporter ID | Correlation |
|----------------|-------------|-------------|
| <i>INHBA</i>   | 210511_s_at | 1           |
| <i>THBS2</i>   | 203083_at   | 0.90183127  |
| <i>COL11A1</i> | 204320_at   | 0.8865286   |
| <i>COL11A1</i> | 37892_at    | 0.8865286   |
| <i>FAP</i>     | 209955_s_at | 0.8479447   |
| <i>CTSK</i>    | 202450_s_at | 0.8479447   |
| <i>VCAN</i>    | 211571_s_at | 0.8479447   |
| <i>SPARC</i>   | 200665_s_at | 0.8177246   |
| <i>SPARC</i>   | 212667_at   | 0.8177246   |
| <i>AEBP1</i>   | 201792_at   | 0.8177246   |
| <i>COL1A2</i>  | 202403_s_at | 0.8177246   |
| <i>COL1A2</i>  | 202404_s_at | 0.8177246   |
| <i>COL6A3</i>  | 201438_at   | 0.8177246   |
| -              | 211161_s_at | 0.8177246   |
| <i>COL3A1</i>  | 215076_s_at | 0.8177246   |
| <i>COL3A1</i>  | 201852_x_at | 0.8177246   |
| <i>COL1A1</i>  | 202310_s_at | 0.8177246   |
| <i>COL1A1</i>  | 202311_s_at | 0.8177246   |
| <i>COL5A1</i>  | 203325_s_at | 0.8177246   |
| <i>COL5A1</i>  | 212489_at   | 0.8177246   |
| <i>COL5A1</i>  | 212488_at   | 0.8177246   |
| -              | 221729_at   | 0.8177246   |
| <i>COL5A2</i>  | 221730_at   | 0.8177246   |
| <i>MMP2</i>    | 201069_at   | 0.81008625  |
| <i>SNAI2</i>   | 213139_at   | 0.8011878   |
| <i>FBN1</i>    | 202765_s_at | 0.8011878   |
| <i>FBN1</i>    | 202766_s_at | 0.8011878   |
| <i>FN1</i>     | 211719_x_at | 0.7849791   |
| <i>FN1</i>     | 210495_x_at | 0.7849791   |
| <i>FN1</i>     | 216442_x_at | 0.7849791   |
| <i>FN1</i>     | 212464_s_at | 0.7849791   |
| <i>COL10A1</i> | 217428_s_at | 0.7731993   |
| -              | 205941_s_at | 0.7731993   |
| <i>CDH11</i>   | 207172_s_at | 0.7619725   |
| <i>CDH11</i>   | 207173_x_at | 0.7619725   |
| <i>DCN</i>     | 209335_at   | 0.7619725   |
| <i>DCN</i>     | 201893_x_at | 0.7619725   |
| <i>DCN</i>     | 211813_x_at | 0.7619725   |
| <i>DCN</i>     | 211896_s_at | 0.7619725   |

|          |             |            |
|----------|-------------|------------|
| LUM      | 201744_s_at | 0.7619725  |
| SERPINF1 | 202283_at   | 0.731467   |
| CRISPLD2 | 221541_at   | 0.72007775 |
| ASPN     | 219087_at   | 0.72007775 |
| POSTN    | 210809_s_at | 0.72007775 |
| TMEM158  | 213338_at   | 0.7155617  |
| OLFML2B  | 213125_at   | 0.7155617  |
| ADAM12   | 213790_at   | 0.7155617  |
| ADAM12   | 202952_s_at | 0.7155617  |
| NTM      | 222020_s_at | 0.7155617  |
| ECM1     | 209365_s_at | 0.7155617  |
| LRRC15   | 213909_at   | 0.7155617  |
| MMP11    | 203876_s_at | 0.7155617  |
| MMP11    | 203878_s_at | 0.7155617  |
| COPZ2    | 219561_at   | 0.71121013 |
| PCOLCE   | 202465_at   | 0.6899231  |
| THBS1    | 201108_s_at | 0.68605226 |
| THBS1    | 201109_s_at | 0.68605226 |
| THBS1    | 201110_s_at | 0.68605226 |
| GLT8D2   | 221447_s_at | 0.68131775 |
| -        | 221019_s_at | 0.68131775 |
| MMP19    | 204575_s_at | 0.67816544 |
| COL6A1   | 212091_s_at | 0.6591419  |
| COL6A1   | 213428_s_at | 0.6591419  |
| COL6A2   | 209156_s_at | 0.6591419  |
| ANGPTL2  | 213004_at   | 0.6519295  |
| ANGPTL2  | 213001_at   | 0.6519295  |
| ITGA5    | 201389_at   | 0.6519295  |
| LOXL2    | 202998_s_at | 0.6519295  |
| RAB31    | 217762_s_at | 0.6445346  |
| RAB31    | 217764_s_at | 0.6445346  |
| RAB31    | 217763_s_at | 0.6445346  |
| PLAU     | 205479_s_at | 0.6445346  |
| PLAU     | 211668_s_at | 0.6445346  |
| VCAM1    | 203868_s_at | 0.6445346  |
| LPPR4    | 213496_at   | 0.6307415  |
| ETV1     | 221911_at   | 0.6307415  |
| COL16A1  | 204345_at   | 0.6217892  |
| BGN      | 213905_x_at | 0.6217892  |
| BGN      | 201261_x_at | 0.6217892  |
| C1QTNF3  | 220988_s_at | 0.6091054  |
| TIMP3    | 201150_s_at | 0.6091054  |
| TIMP3    | 201148_s_at | 0.6091054  |
| TIMP3    | 201149_s_at | 0.6091054  |
| TIMP3    | 201147_s_at | 0.6091054  |

|               |             |            |
|---------------|-------------|------------|
| -             | 214927_at   | 0.6091054  |
| <i>ITGBL1</i> | 205422_s_at | 0.6091054  |
| <i>EPYC</i>   | 206439_at   | 0.6091054  |
| <i>PRRX1</i>  | 205991_s_at | 0.60363436 |
| <i>EDNRA</i>  | 216235_s_at | 0.60363436 |
| <i>EDNRA</i>  | 204463_s_at | 0.60363436 |
| <i>EDNRA</i>  | 204464_s_at | 0.60363436 |

**Supplementary Table 2: Gene co-expression with *IL6* in TCGA ovarian cancer samples (highlighted genes common with Table S1)**

| Gene Symbol     | Reporter ID | Correlation |
|-----------------|-------------|-------------|
| <i>IL6</i>      | 205207_at   | 1           |
| <i>HBEGF</i>    | 203821_at   | 0.533625    |
| <i>CH25H</i>    | 206932_at   | 0.492976    |
| <i>THBD</i>     | 203887_s_at | 0.492976    |
| <i>NR4A3</i>    | 209959_at   | 0.492976    |
| <i>GEM</i>      | 204472_at   | 0.492976    |
| <i>RGS2</i>     | 202388_at   | 0.492976    |
| <i>SLC2A14</i>  | 216236_s_at | 0.391042    |
| <i>SLC2A3</i>   | 202497_x_at | 0.391042    |
| <i>SGK1</i>     | 201739_at   | 0.334213    |
| <i>PTGS2</i>    | 204748_at   | 0.304811    |
| <i>NR4A2</i>    | 204621_s_at | 0.293695    |
| <i>DUSP2</i>    | 204794_at   | 0.293695    |
| <i>BTG2</i>     | 201236_s_at | 0.293695    |
| <i>ZEB1</i>     | 208078_s_at | 0.293695    |
| <i>RHOB</i>     | 212099_at   | 0.293695    |
| <i>JUN</i>      | 201464_x_at | 0.293695    |
| <i>IER2</i>     | 202081_at   | 0.293695    |
| <i>JUNB</i>     | 201473_at   | 0.293695    |
| <i>KLF6</i>     | 208961_s_at | 0.293695    |
| <i>GADD45B</i>  | 207574_s_at | 0.293695    |
| <i>PPP1R15A</i> | 37028_at    | 0.293695    |
| <i>EGR2</i>     | 205249_at   | 0.293695    |
| <i>CYR61</i>    | 201289_at   | 0.293695    |
| <i>CTGF</i>     | 209101_at   | 0.293695    |
| <i>ATF3</i>     | 202672_s_at | 0.293695    |
| <i>DUSP1</i>    | 201044_x_at | 0.293695    |
| <i>EGR3</i>     | 206115_at   | 0.293695    |
| <i>NR4A1</i>    | 202340_x_at | 0.293695    |
| <i>FOSB</i>     | 202768_at   | 0.293695    |
| <i>ZFP36</i>    | 201531_at   | 0.293695    |
| <i>EGR1</i>     | 201694_s_at | 0.293695    |
| <i>FOS</i>      | 209189_at   | 0.293695    |
| <i>CEBPD</i>    | 203973_s_at | 0.293695    |
| <i>EDN1</i>     | 218995_s_at | 0.293695    |
| <i>C10orf10</i> | 209182_s_at | 0.293695    |
| <i>GADD45A</i>  | 203725_at   | 0.293695    |
| <i>KLF10</i>    | 202393_s_at | 0.293695    |
| <i>BHLHE40</i>  | 201169_s_at | 0.293695    |
| <i>PLK3</i>     | 204958_at   | 0.293695    |



|               |             |          |
|---------------|-------------|----------|
| <i>DUSP5</i>  | 209457_at   | 0.293695 |
| <i>LIF</i>    | 205266_at   | 0.293695 |
| <i>MAFF</i>   | 205193_at   | 0.293695 |
| <i>IER3</i>   | 201631_s_at | 0.293695 |
| <i>C8orf4</i> | 218541_s_at | 0.293695 |

**Supplementary Table 3: Gene co-expression with *INHBA* in TCGA breast and colorectal cancer samples (highlighted genes common with Table S1)**

| Breast Cancer       |                  |          |
|---------------------|------------------|----------|
| <i>INHBA</i>        | A_23_P122922     | 1        |
| <i>PPAPDC1A</i>     | A_24_P810284     | 0.847718 |
| <i>COL11A1</i>      | A_23_P11806      | 0.847718 |
| <i>KIF26B</i>       | A_23_P63541      | 0.804722 |
| <i>MMP11</i>        | A_23_P57417      | 0.79355  |
| <i>COL10A1</i>      | A_23_P214140     | 0.79355  |
| <i>GJB2</i>         | A_23_P407042     | 0.77325  |
| <i>FN1</i>          | A_24_P85539      | 0.756792 |
| <i>MMP13</i>        | A_23_P138931     | 0.713044 |
| <i>HSD17B6</i>      | A_23_P25030      | 0.704811 |
| <i>SPOCK1</i>       | A_24_P354689     | 0.675556 |
| <i>COL12A1</i>      | A_24_P291814     | 0.675556 |
| <i>CTHRC1</i>       | A_23_P111886     | 0.675556 |
| <i>COL3A1</i>       | A_24_P935491     | 0.675556 |
| <i>ASPN</i>         | NM_017680_2_2198 | 0.675556 |
| <i>AEBP1</i>        | A_23_P145918     | 0.675556 |
| <i>NOX4</i>         | A_23_P47147      | 0.675556 |
| <i>COL8A1</i>       | A_23_P69030      | 0.675556 |
| <i>COL1A2</i>       | A_24_P265274     | 0.675556 |
| <i>LOC651721</i>    | A_24_P282266     | 0.675556 |
| <i>WISP1</i>        | NKI_NM_003882    | 0.675556 |
| <i>LOC100128844</i> | A_32_P141365     | 0.675556 |
| <i>P4HA3</i>        | A_23_P127956     | 0.675556 |
| <i>TMEM90B</i>      | NM_024893_1_1555 | 0.675556 |
| <i>LRRC15</i>       | A_24_P827032     | 0.675556 |
| <i>CDH11</i>        | A_23_P152305     | 0.675556 |
| <i>POSTN</i>        | A_24_P347411     | 0.675556 |
| <i>ADAM12</i>       | A_23_P202327     | 0.675556 |
| <i>COL6A3</i>       | NM_004369_1_9684 | 0.675556 |
| <i>VCAN</i>         | A_23_P144959     | 0.675556 |
| <i>COL1A1</i>       | A_23_P207521     | 0.675556 |
| <i>COL5A2</i>       | A_23_P10391      | 0.675556 |
| <i>COL5A1</i>       | A_23_P158590     | 0.675556 |
| <i>THBS2</i>        | A_23_P253652     | 0.675556 |
| <i>FAP</i>          | A_23_P56746      | 0.675556 |
| <i>TNFSF4</i>       | A_23_P126836     | 0.655745 |
| <i>LOC401097</i>    | A_23_P305243     | 0.655745 |
| <i>CILP2</i>        | A_23_P108238     | 0.642901 |
| <i>CORIN</i>        | A_23_P81131      | 0.634304 |
| <i>TLL2</i>         | A_23_P404778     | 0.610464 |
| <i>ERMN</i>         | A_23_P102017     | 0.609356 |
| <i>PLAU</i>         | A_23_P24103      | 0.609356 |

|                  |                  |          |
|------------------|------------------|----------|
| <i>SULF1</i>     | A_23_P43165      | 0.609356 |
| <i>KIAA1199</i>  | A_23_P324754     | 0.609356 |
| <i>GREM1</i>     | A_23_P432945     | 0.571732 |
| <i>COMP</i>      | A_23_P90436      | 0.565048 |
| <i>PPEF1</i>     | A_23_P125505     | 0.543588 |
| <i>GRM8</i>      | A_32_P8221       | 0.543588 |
| <i>MATN3</i>     | NM_002381_2_2496 | 0.527919 |
| <i>C20orf103</i> | A_23_P40294      | 0.527919 |
| <i>GRP</i>       | A_23_P101134     | 0.527919 |
| <i>ST6GAL2</i>   | A_32_P126157     | 0.527919 |
| <i>RGS4</i>      | A_23_P200737     | 0.510739 |
| <i>LOC285548</i> | A_24_P892494     | 0.50405  |
| <i>NKX3-2</i>    | A_23_P386254     | 0.50405  |

| Colorectal Cancer |                  |          |
|-------------------|------------------|----------|
| <i>INHBA</i>      | A_23_P122922     | 1        |
| <i>COL11A1</i>    | NM_080629_1_6174 | 0.889562 |
| <i>ADAM12</i>     | NM_003474_2_4854 | 0.826843 |
| <i>NOX4</i>       | A_23_P47148      | 0.826843 |
| <i>CTHRC1</i>     | A_23_P111886     | 0.826843 |
| <i>FAP</i>        | A_23_P56746      | 0.826843 |
| <i>COL10A1</i>    | A_23_P214140     | 0.826843 |
| <i>COL5A2</i>     | A_32_P218731     | 0.811893 |
| <i>WISP1</i>      | NKI_NM_003882    | 0.809216 |
| <i>PDPN</i>       | A_23_P201322     | 0.809216 |
| <i>COL8A1</i>     | A_23_P69030      | 0.786018 |
| <i>ITGA11</i>     | A_23_P206022     | 0.786018 |
| <i>P4HA3</i>      | A_23_P127956     | 0.786018 |
| <i>SULF1</i>      | A_23_P43165      | 0.786018 |
| <i>THBS2</i>      | A_23_P253651     | 0.786018 |
| <i>PPAPDC1A</i>   | A_24_P810284     | 0.786018 |
| <i>COL1A1</i>     | A_23_P207521     | 0.786018 |
| <i>COL12A1</i>    | A_24_P291810     | 0.786018 |
| <i>COL6A3</i>     | NM_004369_1_9860 | 0.786018 |
| <i>COL1A2</i>     | A_23_P255244     | 0.786018 |
| <i>SPARC</i>      | A_23_P7642       | 0.786018 |
| <i>ZNF469</i>     | A_23_P335080     | 0.786018 |
| <i>CDH11</i>      | A_23_P152305     | 0.786018 |
| <i>KAL1</i>       | A_23_P429948     | 0.754175 |
| <i>LOC651721</i>  | A_24_P282266     | 0.744667 |
| <i>HS3ST3A1</i>   | A_23_P66523      | 0.72371  |
| <i>POSTN</i>      | A_23_P205111     | 0.72371  |
| <i>LOX</i>        | NM_002317_3_1867 | 0.72371  |
| <i>TWIST1</i>     | A_23_P71067      | 0.715534 |
| <i>ST6GALNAC5</i> | A_23_P33093      | 0.698786 |
| <i>LUM</i>        | A_32_P28664      | 0.698786 |
| <i>TMEM90B</i>    | A_24_P190504     | 0.698786 |
| <i>FBN1</i>       | A_24_P152553     | 0.698786 |
| <i>ANTXR1</i>     | A_24_P131522     | 0.698786 |
| <i>NTM</i>        | A_23_P84060      | 0.698786 |
| <i>SPOCK1</i>     | A_23_P81598      | 0.698786 |
| <i>HTRA3</i>      | A_23_P395438     | 0.698786 |
| <i>TNFSF4</i>     | A_23_P126833     | 0.672474 |
| <i>MXRA5</i>      | A_24_P282355     | 0.662766 |
| <i>ADAMTS6</i>    | A_23_P213319     | 0.632247 |
| <i>KIF26B</i>     | A_23_P63541      | 0.632247 |
| <i>CNIH3</i>      | A_23_P384044     | 0.625946 |
| <i>SHISA2</i>     | A_32_P55236      | 0.625946 |

|                 |                  |          |
|-----------------|------------------|----------|
| <i>MMP11</i>    | A_23_P57417      | 0.625946 |
| <i>PPEF1</i>    | A_23_P125503     | 0.625946 |
| <i>MFAP2</i>    | A_23_P1027       | 0.625946 |
| <i>LRRC15</i>   | A_24_P827037     | 0.616798 |
| <i>HMCN1</i>    | A_23_P148991     | 0.616798 |
| <i>CRISPLD1</i> | A_23_P59958      | 0.616798 |
| <i>COMP</i>     | A_23_P90430      | 0.616798 |
| <i>ITGBL1</i>   | A_23_P113777     | 0.616798 |
| <i>SFRP4</i>    | A_23_P215320     | 0.616798 |
| <i>KCNE4</i>    | A_23_P392574     | 0.604307 |
| <i>DIO2</i>     | A_23_P48736      | 0.581334 |
| <i>CLEC5A</i>   | A_23_P304356     | 0.550313 |
| <i>SLN</i>      | A_23_P150343     | 0.550313 |
| <i>C5orf46</i>  | A_23_P19176      | 0.550313 |
| <i>FGF1</i>     | A_23_P213330     | 0.550313 |
| <i>OLR1</i>     | A_24_P124624     | 0.550313 |
| <i>SPP1</i>     | A_23_P7311       | 0.550313 |
| <i>MMP13</i>    | A_23_P138931     | 0.54776  |
| <i>ALPK2</i>    | A_23_P15876      | 0.54776  |
| <i>PRRX1</i>    | A_23_P502731     | 0.54776  |
| <i>FN1</i>      | NM_002026_1_7942 | 0.541192 |
| <i>DKK2</i>     | A_23_P155847     | 0.52731  |
| <i>GRP</i>      | A_23_P101134     | 0.52731  |
| <i>EDNRA</i>    | A_24_P217572     | 0.521915 |

**Supplementary Table 4: Primer Sequences**

| Human Sequences  |                          |                       |
|------------------|--------------------------|-----------------------|
| B-actin          | AGCCTCGCCTTTGCCGA        | CTGGTGCCTGGGGCG       |
| <i>ACTA2</i>     | CCAGAGCCATTGTCACACAC     | CAGCCAAGCACTGTCAGG    |
| <i>INHBA</i>     | ATCTCGAAGTGCAGCGTCTT     | GGAGGGCAGAAATGAATGAA  |
| <i>S100A4</i>    | TGTTGCTGTCCAAGTTGCTC     | AACTAAAGGAGCTGCTGACCC |
| <i>FAP</i>       | TCAGTGTGAGTGCTCTCATTGTAT | GCTGTGCTTGCCTTATTGGT  |
| <i>ADRB2</i>     | TCCACCTGGCTAAGGTTCTG     | TGTCCTTCTACGTTCCCCTG  |
| <i>ACVR2a</i>    | GAAAGCCCAGTTGCTTAACG     | GAAAGCCCAGTTGCTTAACG  |
| <i>ACVR2b</i>    | TGAGTACATGCTGCCCTTTG     | TAATGGTGGGCCTCATCTTC  |
| <i>COL3A1</i>    | GATGGGGTCAAATGAAGGTG     | GTGTGTTTCGTGCAACCATC  |
| <i>COL5A1</i>    | AGGATTTCTGGACCAAAGG      | TCTTGCCTTGGAAACCAGTC  |
| <i>COL5A2</i>    | CGGTGAAGAAGGCAAAAGAG     | TTCTCCTTGAGCACCTTTG   |
| <i>COL11A1</i>   | TCCTGGTGAAAAGGACCAC      | TTCTTTCCCAGGATGACCAG  |
| CREB pos<br>1*   | ACAACCCTTCACCGTTCTTG     | ATAGGGGTAAAGCTGGTCAGG |
| CREB neg *       | GAGATTCTAAAGACCTGGGAAGG  | CGACCCCAACCAACTTACAC  |
| Murine Sequences |                          |                       |
| B-actin          | GCTACAGCTTCACCACCACA     | TCTCCAGGGAGGAAGAGGAT  |
| <i>ACTA2</i>     | G TTCAGTGGTGCCTCTGTCA    | ACTGGGACGACATGGAAAAG  |
| <i>S100A4</i>    | TTTGTGGAAGGTGGACACAA     | CAGCACTTCCTCTCTCTTGG  |
| <i>FAP</i>       | CTTTGTGTTTCCTTCAGGTTTG   | CTTTGGAGTTACCACCCTGG  |
| <i>ACVR2a</i>    | GGCGACATTGTTTTGCTACC     | AGCCAACAACCTTGCTTCAC  |
| <i>ACVR2b</i>    | CTTTAAGCCCTTGCCTTTCC     | TCACAGCCACAAAGTCGTTT  |
| <i>COL3A1</i>    | AGGATCTGTCTTTGCGATG      | TCTCCAAATGGGATCTCTGG  |
| <i>COL5A1</i>    | TGAACAGATGAAGCGACCAC     | TATTCGCCATCTGGGAAGTC  |
| <i>COL5A2</i>    | TCCTCAGGGAATTGATGGAG     | GCCATCTGAGCTGAAAAGG   |
| <i>COL11A1</i>   | TGGTCATCCTGGGAAAGAAG     | ACCCTTTTCGCCTTTAGAGC  |

\*ChIP primers



Uncut blot for Supplementary Figure 2d  
aSMA expression in NOF151 after exposure to  
conditioned media.

Antibody: ab5694 (alpha smooth muscle actin, Abcam)

Observed band: 42kDa

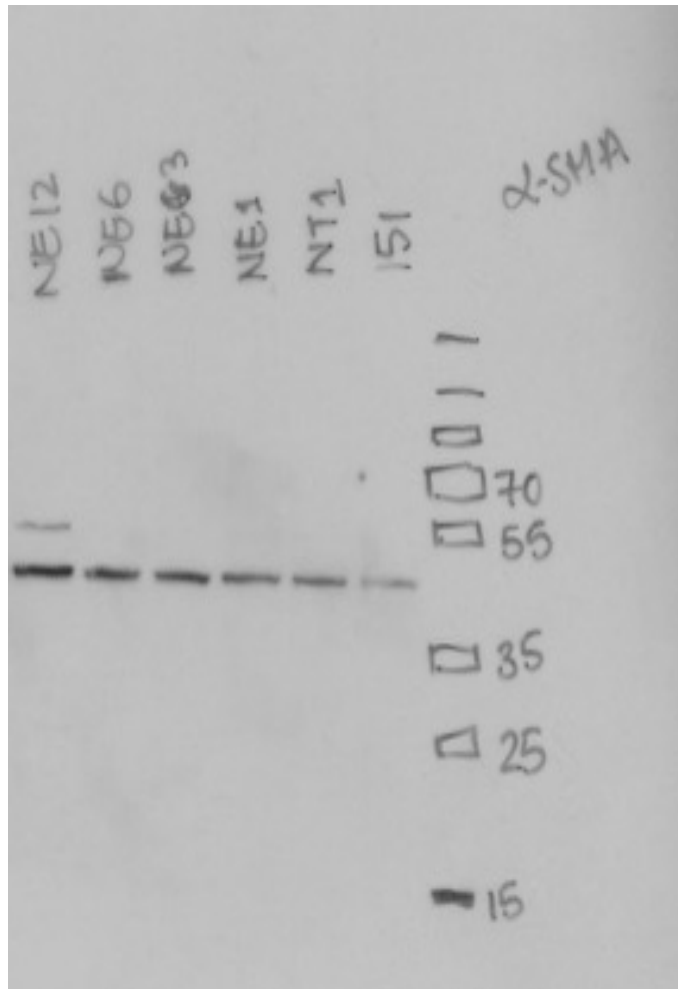

Uncut blot for Supplementary Figure 2d  
aSMA expression after exposure to conditioned  
media.

Antibody: A5316 (beta-actin, Sigma Aldrich)

Observed band: 42kDa

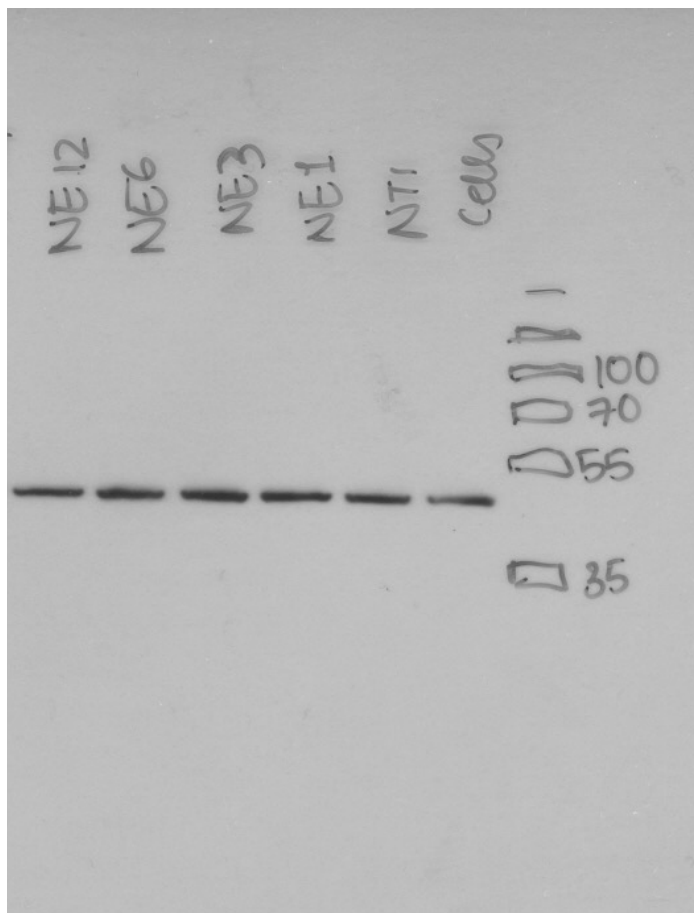

Supplement: jciinsight-2-93076-s001.pdf [file jciinsight-2-93076-s001.pdf]
